1                   **Endophyte *Chaetomium globosum* D38 and its**  
2                   **elicitors promote tanshinones accumulation of *Salvia***  
3                   ***miltiorrhiza***

4   Xin Zhai<sup>#</sup>, Dong Luo<sup>#</sup>, Xiuqing Li<sup>#</sup>, Ting Han, Zhouyang Kong, Jiachen Ji, Luping  
5   Qin\*, Chengjian Zheng\*

6   Department of Pharmacognosy, School of Pharmacy, Second Military Medical  
7   University, 325 Guohe Road, Shanghai 200433, China

8   <sup>#</sup> These authors contributed equally to this manuscript.

9   \*Corresponding author:

10   E-mail addresses: zhengchengjian1984@126.com or zheng\_chengjian@hotmail.com  
11   (C.-J Zheng); Tel/fax: +86 21 81871305

12   Co-corresponding author:

13   E-mail address: qinmmu@126.com (L.-P Qin); Tel/fax: +86 21 81871309

14  
15   **Abstract**

16   Due to the low yield of tanshinones and their analogues in *Salvia miltiorrhiza*, there  
17   are all kinds of stimulation strategies having been applied to improve tanshinones  
18   output in plant tissue cultures. Endophytic fungi have formed various different  
19   relationships with their host plants withstanding host and environmental factors,  
20   including symbiotic, mutualistic, commensalistic, and parasitic. Thus we take the  
21   assumption that endophytic fungi may be an emerging microbial tool used to promote  
22   secondary metabolism, which will promote the production of active compounds  
23   through endophyte-based biology method. Our study therefore aimed to examine the  
24   effects of live endophytic fungus *Chaetomium globosum* D38 and its elicitors on the  
25   accumulation of tanshinones in hairy root cultures of *Salvia miltiorrhiza*. *C. globosum*  
26   D38 mainly colonized in the intercellular gap of xylem parenchyma cells of *S.*  
27   *miltiorrhiza* hairy root, during long term co-existence without any toxicity against *S.*  
28   *miltiorrhiza* hairy root. Moreover, both of the live fungus and its mycelia extracts  
29   could induce the production of tanshinones, in special dihydrotanshinone I and  
30   cryptotanshinone. The effects of mycelia extracts were much stronger than that of the  
31   live fungus on tanshinones synthesis, which increased the transcriptional activity of  
32   genes with respect to tanshinone biosynthetic pathway obviously. Our results indicated

33 that both of the live *C. globosum* D38 and its mycelia extracts could be utilized for  
34 tanshinones accumulation in *S. miltiorrhiza* hairy root. What's more, D38 also could  
35 be made into biotic fertilizer applying into *S.miltiorrhiza* seedlings, which not only  
36 promoted host growth but the tanshinones and phenylpropionic acid accumulation. In  
37 the soil environment, D38 had formed bitrophic and mutual beneficial relationship  
38 with the host and enhanced the primary metabolism on the whole so as to have  
39 facilitative effects on phenylpropionic acid accumulation. To sum up, *Chaetomium*  
40 *globosum* D38 was a highly effective endophytic fungus for *S. miltiorrhiza*.

41 **Key words:** *Chaetomium globosum*; endophytic fungus; *Salvia miltiorrhiza*;  
42 secondary metabolites synthesis; plant growth; infection way.

43

#### 44 **Introduction**

45 It was important to study host-microbe interactions, medicine or agriculture and  
46 especially for the influence of long-term microbial beneficially colonization on herbal  
47 medicine(Guo et al. 2015). Herbal medicines consumption has been increasing  
48 steadily and plant-derived secondary metabolites have become an important part for  
49 human health and nutrition. However, the yield of secondary metabolites in plants is  
50 rather little and depends greatly on physiological stages of the plants (Chandra and  
51 Chandra 2011). In recent years, cultured plant tissues have become a promising  
52 alternative source for bioactive secondary metabolites increasingly desired in medical  
53 and pharmaceutical field (Ahlawat et al. 2014). It is known that elicitation can  
54 enhance biosynthesis of secondary metabolites and biotic elicitors (Thwe et al. 2016)  
55 have particularly been used to induce the secondary metabolites accumulation  
56 (Bahabadi et al. 2014). It is one of the most effective means to induce secondary  
57 metabolites biosynthetic pathways in hairy roots or plant cells using pathogenic and  
58 nonpathogenic fungal as biotic elicitors (Huang et al. 2016). Generally, fungi can  
59 easily switch from an endophytic to necrotrophic lifestyle at the evolutionary and  
60 even ecological timescale. Different from necrotrophic fungal, the endophytes could  
61 infect host tissues with no concurrent symptoms of disease (Krings et al. 2007). In  
62 many cases, endophytes form mutualistic interactions and beneficial relationship with  
63 their host(Hyde et al. 2008, Rodriguez et al. 2009), which can not only stimulate plant  
64 growth, but also promote secondary metabolites accumulation in the plant (Murthy et  
65 al. 2014).

66

67 Plant tissue cultures, as the most convenient and useful experimental measures,  
68 are usually used to test various factors on desired products biosynthesis and explore  
69 effective measures to promote their production (Jian et al. 2005, Kai et al. 2011).  
70 However, not all the fungal endophytes have the ability to co-culture with their host  
71 plant tissue for a long time, which depends on the toxicity of the fungal isolate. In  
72 most cases, those fungal were fabricated into elicitors by the way of removing their  
73 toxicity, which can also enhance the secondary metabolites biosynthesis (Giauque  
74 and Hawkes 2013).

75

76 *Salvia miltiorrhiza* Bunge (Lamiaceae) is a famous and very important medicinal  
77 plant in China and the roots have been traditionally utilized to treat menstrual,  
78 cardiovascular and various inflammation-related diseases (Han et al. 2008, Wu and  
79 Yeung 2010). Tanshinones were a kind of bioactive compounds in *S. miltiorrhiza*  
80 roots, which demonstrates versatile pharmacological activities including antioxidant,  
81 cardiovascular protective, antibacterial, anti-inflammatory and antineoplastic  
82 activities (Tu et al. 2012, Koji et al. 2015). However, the low yield of tanshinones  
83 usually requests the use of large amount of plant material and thus appears as a major  
84 obstacle for *S. miltiorrhiza* exploit (Kai et al. 2012).

85 Treatment with elicitor is one of the most effective means for stimulating  
86 secondary metabolism in medicinal plants (Huang et al. 2016). It is reported that there  
87 have been few studies documented on the effects of elicitors, yeast extract (YE),  
88 salicylic acid (SA), and methyl jasmonate (MJ) on the tanshinones metabolism in *S.*  
89 *miltiorrhiza* hairy root (Hui et al. 2001, Ge and Wu 2005). Only our group has  
90 previously reported an elicitor from fungal endophyte *Trichoderma atroviride* D16,  
91 which could significantly promote the biosynthesis of tanshinone constituents (Ming  
92 et al. 2013). However, the hairy roots of *S. miltiorrhiza* can not be long-term co-  
93 cultured with *T. atroviride* D16. So we continued to search for other favorable  
94 endophytes, which could induce tanshinones accumulation without any toxicity  
95 against *S. miltiorrhiza* hairy root during long-term co-culture. This is therefore the  
96 first research on the effect of live endophytic fungus and its elicitor on the  
97 tanshinones production in *S. miltiorrhiza* hairy root. In this study, the tanshinones-  
98 promoting endophyte was identified as *Chaetomium globosum* D38. The effects of *C.*  
99 *globosum* D38 and its extract of mycelium (EM) on the tanshinones accumulation in  
100 *S. miltiorrhiza* hairy root cultures were further studied and the possible mechanism

101 was also discussed for understanding the role of *C. globosum* D38 (Reissing et al.  
102 2003) in host survival. And the *Chaetomium globosum* D38, as a biotic fertilizer, had  
103 the same effects on *S. miltiorrhiza* seedlings, laying the foundation for practical  
104 applications.

105

## 106 **Materials and methods**

### 107 *Isolation and identification of endophytic fungus D38*

108 First of all, in order to remove soil and dirt, the roots of *S. miltiorrhiza* were washed  
109 by running water, followed by deionized water. According to the literature , (Huang  
110 et al. 2009, Tan et al. 2012) the root was cut into 0.5 cm section and sterilized  
111 successively by 75% ethanol for 30 s, 1 min in 2.5% sodium hypochlorite, and 30 s in  
112 75% ethanol. Then, they were flashed by sterile water for four times and desiccated  
113 by sterile filter paper. Finally, the tissues were placed and cultured on PDA medium at  
114 28 °C , which contained 100 mg L<sup>-1</sup> penicillin. The new hyphal was transfered  
115 separately on new medium and incubated subsequencely at 28 °C for 14 days till  
116 obtaining a pure strian.

117 The endophytic fungus was cultured on PDA medium at 28 °C for 7 days and was  
118 characterized by morphological features. The mycelium was scraped and its genomic  
119 DNA was extracted by using the CTAB method from the surface of the PDA medium.  
120 The ITS regions and 5.8 S gene were amplified by using the universal primers ITS5  
121 and ITS4 (Min 2013) and compared by Blast search at the GenBank and aligned with  
122 CLUSTAL X software by using 1000 bootstrap replicates (Larkin et al. 2007) . The  
123 phylogenetic tree was performed using the neighbor-joining method and identification  
124 at species taxonomic levels was based on ≥99% ITS similarity (Achille et al. 2006).  
125 The GenBank accession number of the nucleotide sequence was MF461354 and the  
126 endophytic fungus D38 has been kept in China General Microbiological Culture  
127 Collection Center in Beijing, China (collection number CGMCC 12379).

128

### 129 *Hairy root culture*

130 *S. miltiorrhiza* hairy root was vaccinated to 250 ml conical flasks which contained  
131 100 mL 1/2 B5 medium, which were then cultured at 25 °C, 135 rpm in darkness for 3  
132 weeks. The medium was changed once every week and hairy roots were randomly  
133 divided into blank groups and experimental groups. The plaque was inoculated with a

134 diameter of 0.5 mm inoculation loops to conical flask as experimental group and the  
135 same size of medium patch was inoculated into the blank groups. Endophytic fungi  
136 D38 was cultured with hairy root for 18 days and sampled on 0, 6, 12 and 18 day  
137 respectively. Each treatment has three repeats at each time for blank groups and  
138 experimental groups and nutrient solution was changed every 6 days.

139

#### 140 *Extract of mycelium preparation and induction*

141 Endophytic fungi D38 was inoculated to 250 mL conical flask by inoculating loop (5  
142 mm in diameter). The conical flasks contained about 100 mL 1/2 B5 medium, and  
143 were cultured at 25 °C, 135 rpm for growing in the table concentrator. After 7 days,  
144 D38 was decompressed and filtrated, with D38 mycelium retained and washed 5  
145 times by distilled water. After homogenated for 5 min, D38 mycelium solution was  
146 ultrasonically extracted for 60 min and then treated at 121 °C for 30 min in high  
147 pressure steam sterilization pot to remove free protein substances. Afterwards, the  
148 D38 mycelium solution was decompressed and filtrated as D38 elicitor.

149

#### 150 *Immunocytochemical staining for the observation of D38 infection*

151 Immunocytochemical staining procedure of root tissue was originally described by K.  
152 F. Störkuhl (Störkuhl et al. 1994). Fresh *Salvia miltiorrhiza* hairy root tissue was fixed  
153 in 4% paraformaldehyde for more than 24 h. The hairy root tissue was subsequently  
154 repaired level in the fume hood with a scalpel and then the tissue and the  
155 corresponding label were put in the dehydration box. Next, the dehydration box was  
156 put into the basket and dehydrated with gradient alcohol in turn. After that, waxed  
157 tissue was placed in the embedding machine and added with corresponding  
158 modification. Finally, waxed tissue was sliced in paraffin section by 4 µm. The slice  
159 was put into dimethylbenzene xylene I for 15 min, dimethylbenzene xylene II for 15  
160 min, ethanol I for 5 min, anhydrous ethanol II for 5 min, 75% alcohol for 5 min, 85%  
161 alcohol for 5 min, and distilled water in turn. And then, the slice was put into the  
162 repair box which was filled with EDTA antigen repair buffer (pH 8.0) (Google  
163 biological technology co., Art.No.G1202). The antigen repair was performed in the  
164 microwave. After the medium was heated to boil for 5 min, cut off electricity for 5  
165 min at interval. After natural cooling, the slice was placed into the PBS (pH 7.4) and  
166 washed on the decoloring table for three times, 5 min each time. After spin-dry, the  
167 slice was drew a circle with Pap Pen to prevent the antibody from running away.

168 Dropping 3% BSA (solarbio, Art.No.A8020) in the circle, the tissue was covered  
169 uniformly and closed for 30 min at room temperature. The slice was placed flat on the  
170 wet box with some water and incubated for 24h at 4 °C after added with primary  
171 antibody (1:100 sword bean protein A with fluorescence). Then the slice was put into  
172 PBS (pH 7.4) for decoloration (washing three times, 5 min each time). After added  
173 with the corresponding second antibody in the circle, the slice was incubated for 50  
174 min at room temperature in dark and then washed in the decoloration box for three  
175 times, 5 min each time. After spin-dry, the slice was added with DAPI (Google  
176 biological technology co., Art.No.G1012) and incubated for 10 min at room  
177 temperature in dark. After washed for three times and sealed with anti- fluorescence  
178 quenching tablets (Google biological technology co., Art.No.G1401), slice was  
179 inverted in the fluorescence microscope to collect images (Nasr et al. 2006).

180

#### 181 *Manufacture of D38 fertilizer*

182 There are 250 g wheat bran, 250 g cottonseed shell , 20 g glucose, 3 g KH<sub>2</sub>PO<sub>4</sub>, 1.5 g  
183 MgSO<sub>4</sub>·7 H<sub>2</sub>O dissolving in every 1 liter deionized water through sterilization for  
184 cultivating endophytic fungi D38. After fostering for 14 days, the number of spores  
185 was determined as  $1\sim 2 \times 10^9$  by hemacytometry method. Subsequently, the 20g D38  
186 fertilizers were applied into each *Salvia miltiorrhiza* aseptic seedling cultivated by  
187 sterile soil with sterile water whereas the blank was add by 20g blank wheat bran -  
188 cottonseed medium in July, 2016. And the cultured potted soil matrix is made of pearl  
189 cotton: humus: vermiculite with the ratio of 1:3: 1. Each treatment has five repeats  
190 and was taken sampling every 2 months from September, 2016 to March, 2017 for the  
191 measurement of morphological indexes, biomass and bioactive substances content.

192

#### 193 *HPLC analysis*

194 *S. miltiorrhiza* hairy roots were desiccated at 55 °C in the oven and grinded into  
195 powder. After screened by a 40 mesh, hairy root powder was weighed 0.2 g accurately  
196 and put into 10 mL centrifuge tube. Accurately draw 4 mL of methanol using 5 mL  
197 pipette and add it into the centrifugal tube. After ultrasonically extracted for 60 min,  
198 the sample solution was filtered with 0.45 syringe filter, which was further used for  
199 HPLC analysis. The analysis was performed on an Agilent-1100 system using a  
200 ZOBAX-EXTEND-C18 chromatographic column (250 mm × 4.6 mm, 5 μm) at 30 °C

201 with a H<sub>2</sub>O (+0.1% HCOOH) (A)/ acetonitrile (B) gradient (0-15 min: 80% B, 15-16  
202 min: 80% B-62% B, 16-25 min: 62% B) as previously described(Ming et al. 2013).  
203 Rosmarinic acid, salvianolic acid B, dihydrotanshinone I, tanshinone I,  
204 cryptotanshinone, and tanshinone IIA in the methanol extract of hairy roots were  
205 identified in comparison with the available standards. The reference standards were  
206 aquired from Chengdu Mansite Pharmaceutical Co. Ltd. [Chengdu (Sichuan Province),  
207 PR China].

208

#### 209 *RNA isolation and real-time quantitative PCR analysis*

210 Hairy roots were divided randomly into blank group and D38 groups which were  
211 cultured for 18 days and nutrient solution was changed every 6 days. Hairy roots of  
212 two groups were sampled at 0, 6, 12, and 18 day and preserved in -80 °C refrigerator.  
213 The total RNA of samples were extracted with mir Vana™ miRNA isolation Kit  
214 (TaKaRa). After detecting the good integrity of total RNA and obtaining cDNA by  
215 reversed transcription, the reaction was started on fluorescence quantitative PCR  
216 instrument (LightCycler II 480). The list of primers used in the real-time PCR  
217 reaction is signed as table1 for detecting the gene expressions of *smHMGR*, *smDXR*,  
218 *smGGPPS*, *smCPS*, and *smKSL*, respectively (Ma et al. 2012). The 18S gene was  
219 used as a reference gene to normalize cDNA. The process of RT-PCR reaction is set  
220 as follows: initial degeneration at 95 °C for 15 min, subsequently 40 cycles of 95 °C  
221 degeneration for 10 s, and finally 60 °C annealing extending for 30 s. The specificity  
222 of product was detected by using the melting curve, in which temperature was  
223 elevated slowly from 60 °C to 97 °C, gathering five fluorescent images every °C. The  
224 relative gene expression was quantified using the comparative CT method.

225

226 Table1. The real time-PCR primer of gene.

| Gene name      | Primer                |
|----------------|-----------------------|
| HMGRKF(5'-3')  | AGGCTTTGCAGCGGATAA    |
| HMGRKR(5'-3')  | GAATCTGCACGTATCCCAC   |
| DXRKF (5'-3')  | CCATGACCGGAGTTCTTAG   |
| DXRKR (5'-3')  | GGATGATCTCCTCCAACG    |
| GGPPSKF(5'-3') | CGAGAAGCTCAACGAGGA    |
| GGPPSKR(5'-3') | GTTCTGCCTATGTGCAATGTA |

---

|               |                      |
|---------------|----------------------|
| CPSKF (5'-3') | TGCGAAGAGATTCGCCTAC  |
| CPSKR (5'-3') | CTTGATCTCATCAGGCAAGT |
| KSLKF (5'-3') | CATGTCTGAACAAGGACGTA |
| KSLKR (5'-3') | AATCATCCAAGGTTAGTGCC |
| 18SF (5'-3')  | CCAGGTCCAGACATAGTAAG |
| 18SR (5'-3')  | GTACAAAGGGCAGGGACGTA |

---

227

## 228 *Data analysis*

229 The data of HPLC analysis and semi-quantitative real-time PCR of hairy root  
230 cultures were analyzed by one-way analysis of variance (ANOVA) through SPASS  
231 software which contained both control and different treatments in triplicate. The  
232 results are presented as mean  $\pm$  SD (standard deviation) and the error bars represent  
233 the standard deviation of biological triplicates in the figures. Otherwise, the term  
234 significant has been used to denote the differences for which  $p$  is  $<0.05$  and the  
235 statistical significance of differences in gene transcripts was analyzed by one-sample  
236  $t$ -test.

237

## 238 **Results**

### 239 *Isolation and identification of endophytic fungus D38*

240 The D38 on solid culture is characterized by surface fleece with similar yellowish  
241 color on the back, and microstructure of D38 is long chain without branches (Figure  
242 1). In this study, the internal transcribed spacer region (ITS) of D38 was selected and  
243 sequenced with nuclear ribosomal DNA as a template. Results of the BLAST searches  
244 for D38 strain showed that the ITS rDNA sequences of the isolate shared high  
245 homology with *Chaetomium globosum*. The sequence identity of the ITS and 5.8S  
246 was 99% (Figure 2). According to the molecular data, the strain was identified to the  
247 genus *Chaetomium globosum*.

248

### 249 *Effects of D38 on the contents of tanshinones in *S. miltiorrhiza* hairy roots*

250 During our preliminary study, endophytic isolate D38 can be long-term co-cultured  
251 with *S. miltiorrhiza* hairy roots. Further we investigated the effects of the live fungus  
252 D38 on tanshinones biosynthesis in *S. miltiorrhiza* hairy roots. As shown in Figure 1,  
253 administration of D38 significantly enhanced the contents of dihydrotanshinone I  
254 (DT-I) and cryptotanshinone (CT) on day 6, 12 and 18, compared with that of blank



255 group. The content of dihydrotanshinone I and cryptotanshinone were increased by 9  
256 times and 13.2 times, respectively, on day 18 (Figure 3a and 3b). However, no such  
257 notable activity were observed for D38 on the contents of tanshinone I (T-I) and  
258 tanshinone IIA (T-IIA). D38 only increased the content of tanshinone I on day 6 (1.8  
259 time) (Figure 3c) and elevated the content of tanshinone II A on day 6 (1.7 time) and  
260 18 (1.9 time) (Figure 3d).

261

#### 262 *Immunocytochemical staining of D38 in S. miltiorrhiza hairy roots*

263 After the co-cultivation of *S. miltiorrhiza* hairy root with endophytic fungi D38 after  
264 18 days, the immunofluorescence staining experiment was performed to display the  
265 infection location of D38 (Figure 4). Endophytic fungi D38 infected the cell gap of *S.*  
266 *miltiorrhiza* hairy root tissue, and minority of D38 hypha existed in the tissue cells.  
267 Thus we speculated that mycelium of endophytic fungi D38 started invading into the  
268 internal cells and form the enveloped between intercellular space, which manifested  
269 that D38 could interact with host stably. In conclusion, we found that endophytic  
270 fungi D38 mainly colonized in the intercellular gap of xylem parenchyma cells of *S.*  
271 *miltiorrhiza* hairy root as a beneficial endophyte of *S.miltiorrhiza*.

272

#### 273 *Effects of extract of D38 mycelium (EM) on the tanshinones accumulation in S.* 274 *miltiorrhiza hairy roots*

275 After the treatment of co-culture between hairy root and different concentration of  
276 D38 EM, *S. miltiorrhiza* hairy roots were then extracted ultrasonically with methanol  
277 for HPLC analysis. The data revealed content of tanshinones increased significantly  
278 under the co-culture with D38 inducer solution (Figure 5). And the content of  
279 tanshinone I and cryptotanshinone increased most significantly. On the 18<sup>th</sup> day, the  
280 content of dihydrotanshinone I and cryptotanshinone increased most significantly. The  
281 content of dihydrotanshinone I reached the highest under the action of the 60 mg/L  
282 D38 EM and improved by 22 times compared with the blank group. However, the  
283 content of cryptotanshinone reached the highest under the action of 90 mg/L D38 EM  
284 and increased by 20.3 times compared with blank group. At the same time, tanshinone  
285 I and tanshinone IIA had obvious enhancement under the action of different  
286 concentration of D38 EM. The content of tanshinone I reached the highest by 2.2  
287 times higher than that of blank group under 90 mg/L D38 EM and the content of  
288 tanshinone IIA reached the highest by 2 times compared with the blank group under

289 the action of 90 mg/L D38 EM .

290

291 *Transcriptional response of the tanshinone biosynthetic pathway to the extract of D38*  
292 *mycelium in S. miltiorrhiza hairy roots*

293 After extracting RNA and get cDNA through the reverse transcription reaction, the  
294 transcription level of five key enzyme genes were determined by real-time  
295 quantitative PCR in the tanshinone biosynthesis pathway (Figure 6).

296 D38 EM activated the five key enzymes in the synthesis pathway and the levels of  
297 key enzyme genes expression have significantly improved. The expression level of 3-  
298 hydroxy-3-methylglutaryl-CoA reductase (HMGR) reached highest by 36 times in  
299 18<sup>th</sup> day compared with the blank group involved in the mevalonate (MVA)  
300 pathway. In the 2-C-methyl-D-erythritol-4-phosphate (MEP) pathway, the expression  
301 level of 1-deoxyd-xylulose 5-phosphate reductoisomerase (DXR) reached the highest  
302 by 9.35 times compared with the blank group in 12<sup>th</sup> day. In the downstream pathway,  
303 the expression level of geranylgeranyl diphosphate synthase (GGPPS), copalyl  
304 diphosphate synthase (CPS), kaurene synthase-like (KSL) was enhanced significantly,  
305 especially the 12<sup>th</sup> and 18<sup>th</sup> day. The expression level of GGPPS and KSL reached  
306 highest by 8 times and 10 times respectively in 12<sup>th</sup> day. The expression level of CPS  
307 reached the highest expression level in 18<sup>th</sup> day by 55.1 times compared with the  
308 blank group.

309

310 *Effects of D38 fertilizer on the tanshinones accumulation in S. miltiorrhiza roots*

311 After the treatment of co-culture between each *S.miltiorrhiza* seedling and 20g D38  
312 fertilizer for half one year from July, 2016 to December, 2016, the morphology  
313 indexes of *S. miltiorrhiza* were recorded including the numbers of leaves, plant height,  
314 wet weight and dry weight. At the same time, *S.miltiorrhiza* roots were then extracted  
315 ultrasonically with methanol for HPLC analysis every two months. The data revealed  
316 D38 fertilizer can promote *S.miltiorrhiza* growth greatly (Supplemental Fig.1) and  
317 the content of salvianolic acid B and tanshinones increased significantly under the co-  
318 culture with D38 (Figure 7,8). And the number of leaves, plant height, wet weight and  
319 dry weight is keeping increased. The number of leaves was increased under the  
320 treatment of D38 fertilizer in Sept. 2016, however, the leaves were growing but some  
321 of leaves were fallen. Therefore, the number of leaves was decreased in Nov. 2016  
322 compared with Sept. 2016. And the plant height of D38 fertilizer was larger than

323 blank group. At the same time, the wet weight and dry weight was 1.95 fold and 5.20  
324 fold than the control in Sept. 2016, and kept the rise rate in the following two months.  
325 That was to say D38 was a growth-promoting endophyte, which can facilitate the  
326 growth of *S.miltoirrhiza* hairy root.

327 In addition, phenolic acid and tanshinones content per unit of root mass was  
328 enhanced drastically under the treatment of D38 fertilizer in November, 2016 and the  
329 total content of bioactive substances is increasing continually during the half year.  
330 The rosmarinic acid content per unit of D38 fertilizer treatment was higher than the  
331 control by 27% and 24% in Sept. and Nov. 2016 separately. The salvianolic acid B  
332 content per unit of D38 fertilizer treatment was higher than the control by 21% in Nov.  
333 2016. And a significant 22% boost of salvianolic acid came up in Nov. 2016. And  
334 the contents of dihydrotanshinone I, cryptotanshinone, tanshinone I and tanshinone  
335 IIA per unit were dramatically enhanced by 2.29 fold, 3.07 fold, 1.30 fold and  
336 1.14fold in Nov. 2016. After 5 months growth, the root of *S.miltoirrhiza* has entered  
337 therapid growth period and the effects of D38 fertilizer was becoming more  
338 significant, which indicated D38 fertilizer could be developed into new biotic  
339 fertilizer.

340

## 341 **Discussion**

342 Plants were associated with various of microbes, containing pathogens, mycorrhizal  
343 fungi, rhizosphere bacteria, and endophytes (Crawford et al. 2010). Most plants  
344 infested by fungi caused no disease symptoms in natural ecosystems. Due the  
345 bioactive compounds belonging to secondary metabolites are usually shorter than  
346 primary metabolites in medicinal plants, a complex network of reactions could be  
347 triggered by all kinds of fungal, which ultimately cuase the synthesis and  
348 accumulation of secondary metabolites(Zhao et al. 2010). For example, an endophytic  
349 fungus was found in the bark of the *Taxus chinensis* tree and could produced three  
350 times as much taxol as non elicited cells (Wang et al. 2001). There are few  
351 endophytes isolated from the host plant which can co-culture with the host plant tissue  
352 for a long time, however, fungal endophytes act as a zoetic elicitor that can multiply  
353 and persistently stimulate the plant tissue(Saikkonen et al. 2004, Rusch 2016). The  
354 effects of plant-microbial interactions depend on the biological and non-biological  
355 factors and the genotypes and interactions of the host(Brader G 2017). It was reported  
356 that successfully infected endophytes may overcome the barrier of periderm of root

357 and enter the above-ground of plant via central cylinder(Sesma and Osbourn 2004,  
358 Sukno et al. 2008). Like some endophytes, D38 was also separated from the leaves of  
359 *S.miltiorrhiza*, which indicated D38 had form bitrophic interaction between D38 and  
360 host not only in root but leaves. Due to the process of endophyte infection, the hyphae  
361 may invade into epidemic cell and then develop the junction to form intercellular  
362 hyphae. After transient interaction, the intact host plasma membrane beseted  
363 intracellular hyphae just for the sake of longer interaction in cortical cells (Kei et al.  
364 2016). Endophyte have a symbiotic relationship with plants, which may experience a  
365 long evolutionary and interacting communication (Wawra et al. 2016). The mycelium  
366 of endophytic fungi developed the best circle by colonizing in intercellular space,  
367 verifying a stable relationship between endophyte and host. In conclusion, endophytic  
368 fungi D38 finally reside in the intercellular gap of xylem parenchyma cells of *S.*  
369 *miltiorrhiza* hairy root as a beneficial endophyte of *S.miltiorrhiza* after a series of  
370 communication.

371

372 In this study, the accumulation of tanshinones in *S. miltiorrhiza* hairy roots was  
373 enhanced by both endophytic *Chaetomium globosum* D38 and its EM, which  
374 indicated D38 exhibited obvious effects on secondary metabolism of *S.miltiorrhiza*  
375 (Fig. 3, Fig. 5). EM is predicted to be one of the main active constituents responsible  
376 for promoting biosynthesis of tanshinones in *S. miltiorrhiza* hairy root cultures by  
377 comparing the effects of endophyte *Chaetomiumglobosum* with EM. In addition, the  
378 transcriptional levels of EM genes involved in the tanshinone biosynthesis pathway is  
379 increased obviously (Fig. 6). However, our present work is the first test to include  
380 *Salvia miltiorrhiza* hairy root co-cultured with endophytic fungal as an effective  
381 strategy for improving tanshinones production in *S Miltiorrhiza* hairy root. As far as  
382 we known, the effects of endophytic fungi and its elicitors on the secondary  
383 metabolism of their host plants was rarely reported. Fungal endophyte infection can  
384 change the metabolic profiles of *Lolium perenne* by carbon/nitrogen exchange  
385 (Rasmussen et al. 2008) and the active substances content of *S.miltiorrhiza*, was  
386 enhanced by beneficial endophytes D38, which predicted D38 and its host may has  
387 some form of substance communication.

388

389 One report indicated that tanshinones had much stronger antimicrobial activity  
390 than phenolic acids among which DT-I and CT exhibited the stronger antimicrobial

391 effect. This may be as a potential reason for EM, isolated from  
392 *Chaetomiumglobozum* D38 dramatically stimulating the biosynthesis of DT-I and CT  
393 (Fig. 5). The phenomenon interpreted into *S.miltiorrhiza* defending itself and  
394 responded to the invading of *Chaetomiumglobozum* D38 mycelium through secreting  
395 more DT-I and CT when *Chaetomium globozum* D38 entered the *S. miltiorrhiza* hairy  
396 root.

397

398 Tanshinones were one kind of bioactive compounds as abietanoid diterpenes in *S.*  
399 *miltiorrhiza* roots, owning mighty and wide therapeutic effects. Nevertheless, the  
400 components account for a low proportion in *S.miltiorrhiza* and regulated by all kinds  
401 of rate-limiting enzymes (Fig. 6). Isopentenyl diphosphate (IPP) and dimethylallyl  
402 diphosphate (DMAPP) were general precursors of terpenoids in plants and  
403 synthesized via mevalonate (MVA) and 2-C-methyl-d-erythritol phosphate (MEP)  
404 pathway. MVA pathway proceeded in the cytoplasm while the other MEP pathway  
405 carried out in the plastids. HMGR is one of significant enzymes in the MVA pathway,  
406 while DXR in the MEP pathway. GGPPS catalyse was the junction enzyme between  
407 MVA and MEP pathway, indicating the significance of GGPPS. As to the  
408 downstream of tanshinone biosynthetic pathway, CPS and KSL are the key point as  
409 we know. For testing the effects of EM of D38, the transcript levels of HMGR, DXR,  
410 GGPPS, CPS, and KSL were investigated by real-time quantitative PCR (Fig. 4).  
411 From 6<sup>th</sup> day to 12<sup>th</sup> day, the transcriptional levels of the five genes were elevated  
412 significantly. The biosynthesis of tanshinones was evidenced mainly occurring via the  
413 MEP pathway, with dependence on the crosstalk between the MEP and the MVA  
414 pathways (Ming et al. 2013). Gene expression levels of GGPPS, CPS, and KSL were  
415 also observed to increase gradually with EM treatment while a little decline occurred  
416 in 18<sup>th</sup> day. These results showed that EM stimulates many of the genes in the  
417 biosynthesis of tanshinones and then promotes the accumulation of tanshinones in *S.*  
418 *miltiorrhiza* hairy roots. However, it kept doubt how EM stimulated these genes  
419 through signal transduction pathway during the process, which need further study

420

421 In the present study, the results suggested that *Chaetomium globozum*D38 and  
422 EM from *Chaetomium globozum*D38 could elicit defence responses in the host plant  
423 as confronting pathogens. EM increased the secondary metabolites of the host by  
424 enhancing the expression of related genes involved in the biosynthesis pathway.

425 Therefore, EM can be used as a potent elicitor for stimulating tanshinone production  
426 in *S. miltiorrhiza* hairy root cultures. As a result, EM could act as a convenient strate  
427 for the extensive production of tanshinones in *S. miltiorrhiza* hairy root culture  
428 systems. The effects of EM are higher than the live endophytic fungal on the  
429 tanshinones synthesis, however, the treatment of live *Chaetomiumglobozum*D38 is  
430 successional and long-time means of stimulating the accumulation of plant  
431 tanshinones.Live *Chaetomium globosum* D38 is responsible for stimulating the  
432 biosynthesis of tanshinones in the hairy root culture and it is possible that live  
433 endophytic fungal can be effectively utilized for large-scale production of  
434 tanshinonesin the *S. miltiorrhiza* hairy root culture system in future studies, which  
435 may be greater and easier than fungal elicitor. At the same time, *Chaetomium*  
436 *globosum* D38 can promote the *S. miltiorrhiza* seedlings growth and the content of  
437 salvianolic acid B and tanshinones in *S. miltiorrhiza* root, which is a great  
438 breakthrough in practical *S. miltiorrhiza* cultivation. This could be interpreted that  
439 D38 can enhance the primary metabolism fluxes causing the increase of  
440 phenylpropionic acid content in soil environment. The number of leaves, plant height,  
441 wet weight and dry weight is keeping increased under the treatment of D38 fertilizer.  
442 As we all know, infection by the fungal endophyte may affect the accumulation of  
443 nutrition, such as inorganic and organic N (Bethlenfalvay et al. 1982, Lyons et al.  
444 1990). In additon, D38 was also separated from the stem of *S.miltiorrhiza* and it may  
445 have transfered into the above-ground of plant by central cylinder. It signified that  
446 D38 has formed bitrophic interaction and reciprocity relationship in nutrients with  
447 *S.miltiorrhiza* (*Hacquard et al. 2016*). Clonization of D38 in the host was a long  
448 selected and interacting process (*Wawra et al. 2016*), indicating D38 is a benefical  
449 endophyte for *S.miltiorrhiza*.

450

## 451 **Acknowledge**

452 The authors declare that they have no conflict of interests. The work was supported by  
453 supported by the National High Technology Research and Development Program of  
454 China (No. 2014AA 020508) and the “Chen Guang” project supported by Shanghai  
455 Municipal Education Commission, Shanghai Education Development Foundation  
456 (13CG40) and National Nature Science Foundation of China (No. 81473301).

457

458 **Figure legends**

459 **Figure 1.** The morphological characteristics and microstructure of D38 (A) Colony  
460 positive photo; (B) Micrograph of 3R-2.

461 **Figure 2.** The phylogenetic tree of the endophytic fungus D38, *Cephalotheca*  
462 *foveolata* (AB27817) is used as outgroup.

463 **Figure 3.** The effect of D38 hyphae on the contents of tanshinones of *S. miltiorrhiza*  
464 hairy roots. Values are presented as means  $\pm$ SD, n=3. \*P < 0.05; \*\*P < 0.01; \*\*\*P <  
465 0.001 versus the control culture.

466 **Figure 4.** The endophytic fungus D38 in *S. miltiorrhiza* hairy roots after  
467 immunofluorescence staining (the red arrows and the circles indicates the mycelia,  
468 amplification factor : 400 $\times$ )

469 **Figure 5.** Effects of the extract from D38 mycelium (EM) on the contents of  
470 tanshinones in *S. miltiorrhiza* hairy roots. Values are presented as means  $\pm$ SD, n=3. \*P  
471 < 0.05; \*\*P < 0.01; \*\*\*P < 0.001 versus the control culture.

472 **Figure 6.** Proposed pathways of tanshinone biosynthesis in *S. miltiorrhiza* (A) and  
473 effects of the D38 EM (100 mg.l<sup>-1</sup>) on the expression of genes in the tanshinone  
474 biosynthetic pathway in *S. miltiorrhiza* hairy roots in 18<sup>th</sup> day (B). HMGR,  
475 hydroxymethylglutaryl-CoA reductase; DXR, 1-deoxy-d-xylulose 5-phosphate  
476 reductoisomerase; GGPPS, geranylgeranyl diphosphate synthase; CPS, copalyl  
477 diphosphate synthase; KSL, kaurene synthase-like. Values are presented as means  
478  $\pm$ SD, n=3. \*P < 0.05; \*\*P < 0.01; \*\*\*P < 0.001 versus the control culture.

479 **Figure 7.** The measurement of morphological indexes under the treatment of 20g D38  
480 fertilizer compared with blank group from September, 2016 to December, 2016. (A)  
481 Number of leaves; (B) Plant height; (C) wet weight; (D) Dry weight.

482 **Figure 8.** The measurement of bioactive substances of *S. miltiorrhiza* root under the  
483 treatment of 20g D38 fertilizer compared with blank group from September, 2016 to  
484 December, 2016. (A) Rosmarinic content per unit of root mass; (B) Total Rosmarinic  
485 content; (C) Salvianolic acid B content per unit of root mass; (D) Total Salvianolic  
486 acid B content; (E) Dihydro-tanshinone I content per unit of root mass; (F) Total  
487 Dihydro-tanshinone I content ; (G) Cryptotanshinone per unit of root mass; (H) Total  
488 Cryptotanshinone content ; (I) Tanshinone I content per unit of root mass; (J) Total  
489 Tanshinone I content; (K) Tanshinone IIA content per unit of root mass; (L) Total  
490 Tanshinone IIA content.

491

492 **Supplemental Figure 1.** The figure of under the treatment of 20g D38 fertilizer  
493 compared with blank group from September, 2016 to December, 2016. (A) The *S.*  
494 *multiorrhiza* seedlings of blank group in September, 2016; (B) The *S. multiorrhiza*  
495 seedlings of 20g D38 fertilizer in September, 2016; (C) The *S. multiorrhiza* seedlings  
496 of blank group in December, 2016; (D) The *S. multiorrhiza* seedlings of 20g D38  
497 fertilizer in December, 2016.

498

## 499 LITERATURE CITED

500

501 **Achille F., Motley T. J., Lowry P. P. and Jérémie J.** 2006. Polyphyly in Guettarda  
502 *L. (Rubiaceae, Guettardeae)* based on nrDNA ITS sequence data. *Annals of the*  
503 *Missouri Botanical Garden* **93**: 103-121.

504 **Ahlatwat S., Saxena P., Alam P., Abdin S. and Wajid M. Z.** 2014. Modulation of  
505 artemisinin biosynthesis by elicitors, inhibitor, and precursor in hairy root cultures of  
506 *Artemisia annua* L. . *Journal of Plant Interactions* **9**: 811-824.

507 **Bahabadi S. E., Sharifi M., Chashmi N. A., Murata J. and Satake H.** 2014.  
508 Significant enhancement of lignan accumulation in hairy root cultures of *Linum*  
509 *album* using biotic elicitors. *Acta Physiologiae Plantarum* **36**: 3325-3331.

510 **Bethlenfalvay G. J., Pacovsky R. S., Bayne H. G. and Stafford A. E.** 1982.  
511 Interactions between nitrogen fixation, mycorrhizal colonization, and host-plant  
512 growth in the phaseolus- rhizobium- glomus Symbiosis. *Plant Physiology* **70**: 446-  
513 450.

514 **Brader G C. S., Vescio K., Mitter B., Trognitz F., Ma L.J., Sessitsch A.** 2017.  
515 Ecology and genomic insights on plant-pathogenic and -nonpathogenic endophytes.  
516 *Annu Rev Phytopathol* **10**: 123-145.

517 **Chandra S. and Chandra R.** 2011. Engineering secondary metabolite production in  
518 hairy roots. *Phytochemistry Reviews* **10**: 371-395.

519 **Crawford K. M., Land J. M. and Rudgers J. A.** 2010. Fungal endophytes of native  
520 grasses decrease insect herbivore preference and performance. *Oecologia* **164**: 431-  
521 441.

522 **Ge X. and Wu J.** 2005. Tanshinone production and isoprenoid pathways in *Salvia*  
523 *multiorrhiza* hairy roots induced by Ag<sup>+</sup> and yeast elicitor. *Plant Science* **168**: 487-  
524 491.

525 **Giauque H. and Hawkes C. V.** 2013. Climate affects symbiotic fungal endophyte  
526 diversity and performance. *American Journal of Botany* **100**: 1435-1444.

527 **Guo L., Qiu J., Han Z., Ye Z., Chen C., Liu C., Xin X., Ye C. Y., Wang Y. Y. and**  
528 **Xie H.** 2015. A host plant genome (*Zizania latifolia*) after a century□long endophyte  
529 infection. *Plant Journal for Cell & Molecular Biology* **83**: 600-609.

530 **Hacquard S., Kracher B., Hiruma K., Münch P. C., Garridooter R., Thon M. R.,**  
531 **Weimann A., Damm U., Dallery J. and Hainaut M.** 2016. Survival trade-offs in  
532 plant roots during colonization by closely related beneficial and pathogenic fungi.  
533 *Nature Communications* **7**: 11362-11371.

534 **Han J. Y., Fan J. Y., Horie Y., Miura S., Cui D. H., Ishii H., Hibi T., Tsuneki H.**  
535 **and Kimura I.** 2008. Ameliorating effects of compounds derived from *Salvia*



- 536 *multiorrhiza* root extract on microcirculatory disturbance and target organ injury by  
537 ischemia and reperfusion. *Pharmacology & Therapeutics* **117**: 280-295.
- 538 **Huang L. H., Feng J. Q., Zhou S. L. and Hong Y. H.** 2009. Isolation and  
539 identification of endophytic fungi of *Huperzia Serrata*. *Chinese Traditional & Herbal*  
540 *Drugs*. **12**: 128-132.
- 541 **Huang X., Yao J., Zhao Y., Xie D., Jiang X. and Xu Z.** 2016. Efficient rutin and  
542 quercetin biosynthesis through flavonoids-related gene expression in *Fagopyrum*  
543 *tataricum* Gaertn. hairy root cultures with UV-B irradiation. *Frontiers in Plant Science*  
544 **7**: 23-31.
- 545 **Hui C., Feng C., Chiu F. C. K. and Lo C. M. Y.** 2001. The effect of yeast elicitor on  
546 the growth and secondary metabolism of hairy root cultures of *Salvia multiorrhiza*.  
547 *Enzyme & Microbial Technology* **28**: 100-105.
- 548 **Hyde K. D., Soyong K. and Hyde K. D.** 2008. The fungal endophyte dilemma.  
549 *Fungal Diversity* **33**: 163-173.
- 550 **Jian Z., Davis L. C. and Verpoorte R.** 2005. Elicitor signal transduction leading to  
551 production of plant secondary metabolites. *Biotechnology Advances* **23**: 283-333.
- 552 **Kai G., Hui X., Zhou C., Pan L., Xiao J., Luo X., You L. and Lin Z.** 2011.  
553 Metabolic engineering tanshinone biosynthetic pathway in *Salvia multiorrhiza* hairy  
554 root cultures. *Metabolic Engineering* **13**: 319-327.
- 555 **Kai G., Pan L., Hui X., Jing W., Zhou C., Wei Z., Qi Y., Xiao J., Wang Y. and Lin**  
556 **Z.** 2012. Molecular mechanism of elicitor-induced tanshinone accumulation in *Salvia*  
557 *multiorrhiza* hairy root cultures. *Acta Physiologiae Plantarum* **34**: 1421-1433.
- 558 **Kei H., Nina G., Soledad S., Thomas N. R., Stéphane H., Barbara K., Ulla N.,**  
559 **Diana R., Marcel B. and O'Connell R. J.** 2016. Root endophyte *Colletotrichum*  
560 *tofieldiae* confers plant fitness benefits that are phosphate status dependent. *Cell* **165**:  
561 464-473.
- 562 **Koji N., Yukari K., Yasufumi N., Mika B., Jun-Ichi K. and Toshihiko N.** 2015.  
563 Inhibitory effects of cryptotanshinone on inflammation-related molecules in human  
564 *Gingival Fibroblasts*. *Jpn J Conserv Dent* **58**: 132-139.
- 565 **Krings M., Taylor T. N., Hass H., Kerp H., Dotzler N. and Hermsen E. J.** 2007.  
566 Fungal endophytes in a 400-million-year-old land plant: infection pathways, spatial  
567 distribution, and host responses. *New Phytologist* **174**: 648-457.
- 568 **Larkin M. A., Blackshields G., Brown N. P., Chenna R., McGettigan P. A.,**  
569 **McWilliam H., Valentin F., Wallace I. M., Wilm A. and Lopez R.** 2007. Clustal W  
570 and Clustal X version 2.0. *Bioinformatics* **23**: 2947-2948.
- 571 **Lyons P. C., Evans J. J. and Bacon C. W.** 1990. Effects of the fungal endophyte  
572 *Acremonium coenophialum* on nitrogen accumulation and metabolism in tall fescue.  
573 *Plant Physiology* **92**: 726-732.
- 574 **Ma Y., Yuan L., Wu B., Li X., Chen S. and Lu S.** 2012. Genome-wide identification  
575 and characterization of novel genes involved in terpenoid biosynthesis in *Salvia*  
576 *multiorrhiza*. *Journal of Experimental Botany* **63**: 2809-2823.
- 577 **Min C. L.** 2013. Isolation and identification of a huperzine A-producing endophytic  
578 fungi from *Huperzia Serrata*. *Natural Product Research & Development* **25**: 590-593.
- 579 **Ming Q., Su C., Zheng C., Jia M., Zhang Q., Zhang H., Rahman K., Han T. and**  
580 **Qin L.** 2013. Elicitors from the endophytic fungus *Trichoderma atroviride* promote  
581 *Salvia multiorrhiza* hairy root growth and tanshinone biosynthesis. *Journal of*  
582 *Experimental Botany* **64**: 5687-5694.
- 583 **Murthy H. N., Lee E. J. and Paek K. Y.** 2014. Production of secondary metabolites  
584 from cell and organ cultures: strategies and approaches for biomass improvement and  
585 metabolite accumulation. *Plant Cell, Tissue and Organ Culture* **118**: 737-743.

- 586 **Nasr S. H., Galgano S. J., Markowitz G. S., Stokes M. B. and D'Agati V. D.** 2006.  
587 Immunofluorescence on pronase-digested paraffin sections: a valuable salvage  
588 technique for renal biopsies. *Kidney International* **70**: 2148-2151.
- 589 **Rasmussen S., Parsons A. J., Fraser K., Xue H. and Newman J. A.** 2008.  
590 Metabolic profiles of *Lolium perenne* are differentially affected by nitrogen supply,  
591 carbohydrate content, and fungal endophyte infection. *Plant Physiology* **146**: 1440-  
592 1447.
- 593 **Reissinger A., Winter S., Steckelbroeck S., Hartung W. and Sikora R. A.** 2003.  
594 Infection of barley roots by *Chaetomium globosum* : evidence for a protective role of  
595 the exodermis. *Mycological Research* **107**: 1094-1102.
- 596 **Rodriguez R. J., Jr J. F. W., Arnold A. E. and Redman R. S.** 2009. Fungal  
597 endophytes: diversity and functional roles. *New Phytologist* **182**: 314-330.
- 598 **Rusch A.** 2016. Symbiosis. *Encyclopedia of Earth Sciences* **1**: 660-661.
- 599 **Saikkonen K., Wäli P., Helander M. and Faeth S. H.** (2004) Evolution of  
600 endophyte-plant symbioses. *Trends in Plant Science* **9**: 275-280.
- 601 **Sesma A. and Osbourn A. E.** 2004. The rice leaf blast pathogen undergoes  
602 developmental processes typical of root-infecting fungi. *Nature* **431**: 582-586.
- 603 **Störkuhl K. F., Hofbauer A., Keller V., Gendre N. and Stocker R. F.** 1994.  
604 Analysis of immunocytochemical staining patterns in the antennal system of  
605 *Drosophila melanogaster*. *Cell and Tissue Research* **275**: 27-38.
- 606 **Sukno S. A., García V. M., Shaw B. D. and Thon M. R.** 2008. Root infection and  
607 systemic colonization of maize by *Colletotrichum graminicola*. *Applied &*  
608 *Environmental Microbiology* **74**: 823-832.
- 609 **Tan X. M., Chen X. M., Wang C. L., Jin X. H., Cui J. L., Chen J., Guo S. X. and**  
610 **Zhao L. F.** 2012. Isolation and identification of endophytic fungi in roots of nine  
611 *Holcoglossum* plants (Orchidaceae) collected from Yunnan, Guangxi, and Hainan  
612 provinces of China. *Current Microbiology* **64**: 140-147.
- 613 **Thwe A., Arasu M. V., Li X., Park C. H., Kim S. J., Al-Dhabi N. A. and Park S.**  
614 **U.** 2016. Effect of different *Agrobacterium rhizogenes* strains on hairy root induction  
615 and phenylpropanoid biosynthesis in *Tartary Buckwheat* (*Fagopyrum tataricum*  
616 Gaertn.). *Frontiers in Microbiology* **7**: 318-349.
- 617 **Tu J., Xing Y., Guo Y., Tang F., Guo L. and Xi T.** 2012. TanshinoneIIA ameliorates  
618 inflammatory microenvironment of colon cancer cells via repression of microRNA-  
619 155. *International Immunopharmacology* **14**: 353-365.
- 620 **Wang C., Wu J. and Mei X.** 2001. Enhancement of taxol production and excretion in  
621 *Taxus chinensis* cell culture by fungal elicitation and medium renewal. *Applied*  
622 *Microbiology & Biotechnology* **55**: 404-410.
- 623 **Wawra S., Fesel P., Widmer H., Timm M., Seibel J., Leson L., Kessler L.,**  
624 **Nostadt R., Hilbert M. and Langen G.** 2016. The fungal-specific  $\beta$ -glucan-binding  
625 lectin FGB1 alters cell-wall composition and suppresses glucan-triggered immunity in  
626 plants. *Nature Communications* **7**: 131-188.
- 627 **Wu W. W. P. and Yeung J. H. K.** 2010. Inhibition of warfarin hydroxylation by  
628 major tanshinones of Danshen (*Salvia miltiorrhiza*) in the rat in vitro and in vivo.  
629 *Phytomedicine International Journal of Phytotherapy & Phytopharmacology* **17**: 219-  
630 225.
- 631 **Zhao J. L., Zhou L. G. and Wu J. Y.** 2010. Effects of biotic and abiotic elicitors on  
632 cell growth and tanshinone accumulation in *Salvia miltiorrhiza* cell cultures. *Applied*  
633 *Microbiology & Biotechnology* **87**: 137-142.

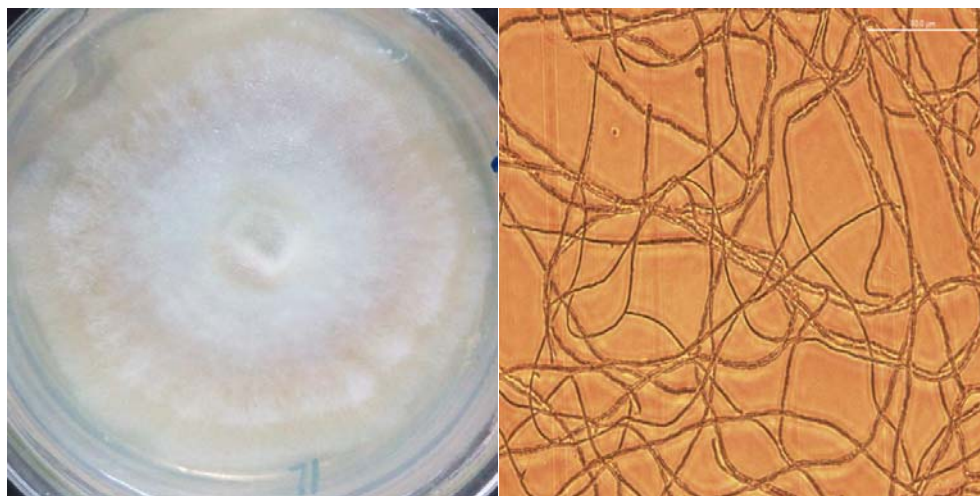

**Figure 1.** The morphological characteristics and microstructure of D38

(A) Colony positive photo; (B) Micrograph of 3R-2.

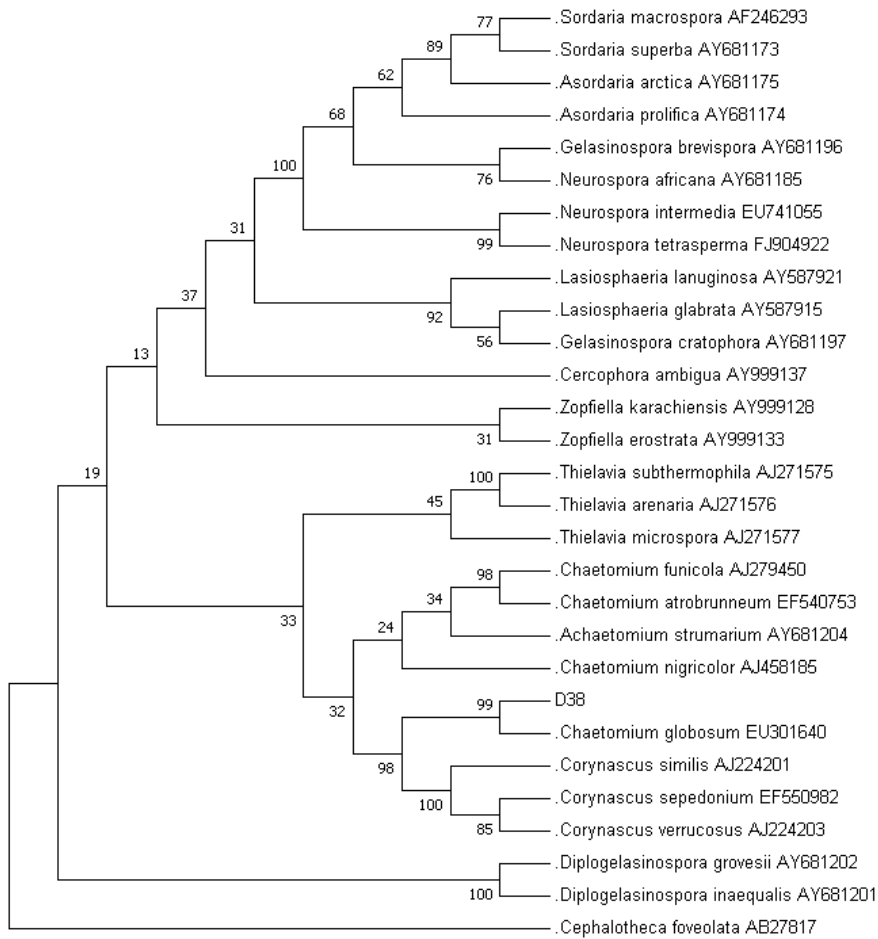

**Figure 2.** The phylogenetic tree of the endophytic fungus D38, *Cephalotheca foveolata* (AB27817) is used as outgroup

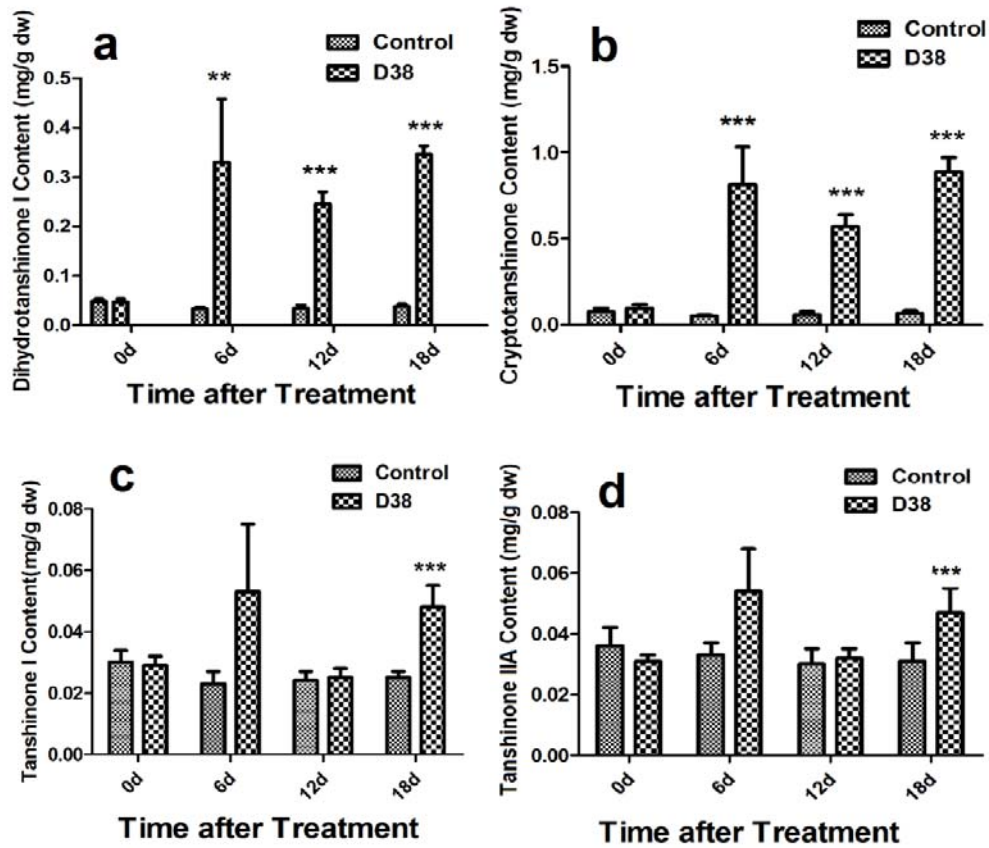

**Figure 3.** The effect of D38 hyphae on the contents of tanshinones of *S. miltiorrhiza* hairy roots. Values are presented as means  $\pm$ SD, n=3. \*P < 0.05; \*\*P < 0.01; \*\*\*P < 0.001 versus the control culture.

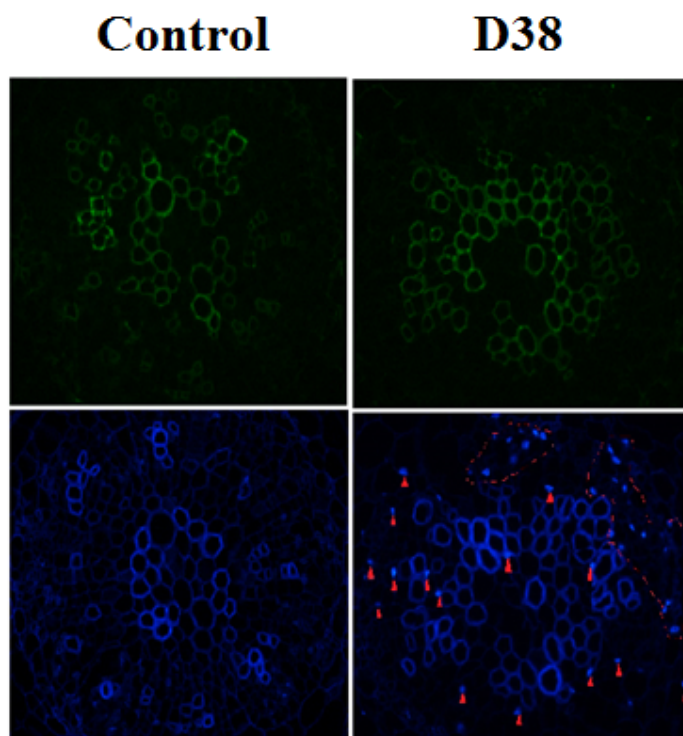

**Figure 4.** The endophytic fungus D38 in *S. miltiorrhiza* hairy roots after immunofluorescence staining (the red arrows and the circles indicates the mycelia, amplification factor : 400×)

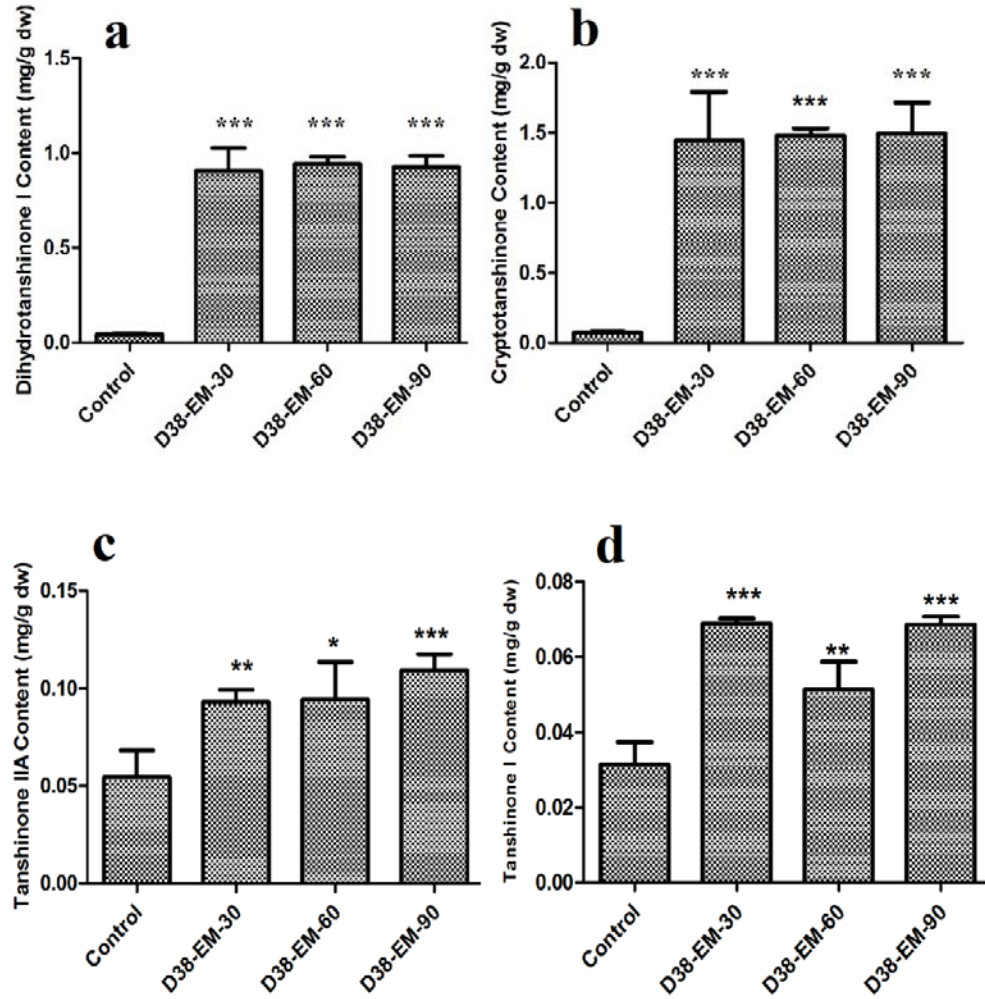

**Figure 5.** Effects of the extract from D38 mycelium (EM) on the contents of tanshinones in *S. multiorrhiza* hairy roots. Values are presented as means  $\pm$ SD, n=3. \*P < 0.05; \*\*P < 0.01; \*\*\*P < 0.001 versus the control culture.

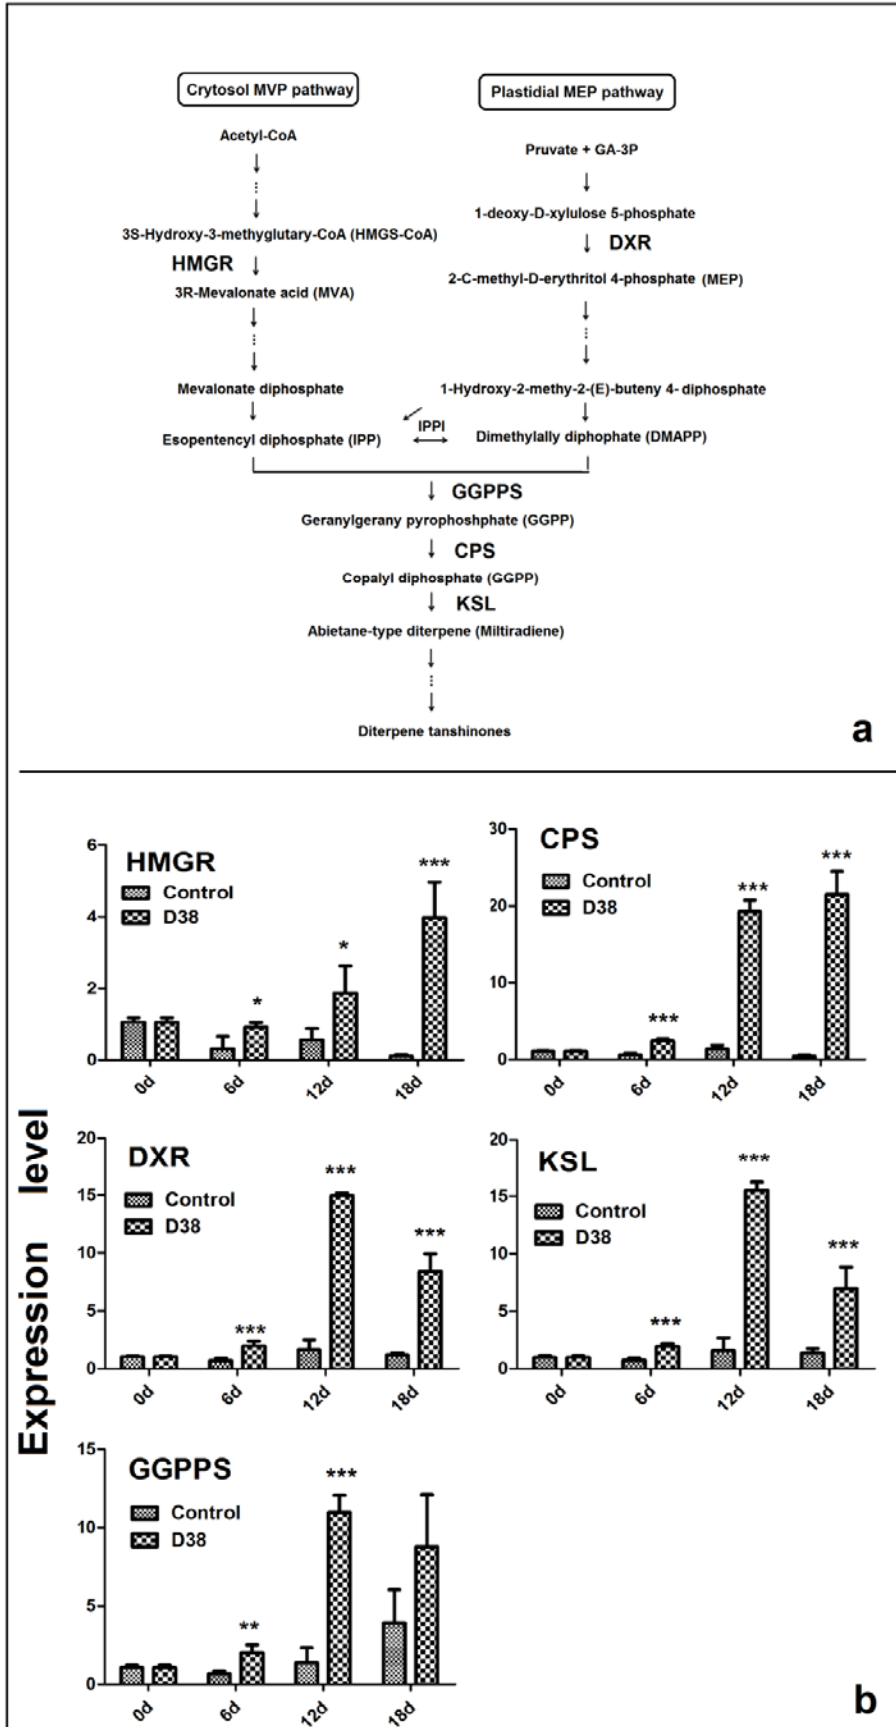



**Figure 6.** Proposed pathways of tanshinone biosynthesis in *S. multiorrhiza* (A) and effects of the D38 EM ( $100 \text{ mg}\cdot\text{l}^{-1}$ ) on the expression of genes in the tanshinone biosynthetic pathway in *S. multiorrhiza* hairy roots in 18<sup>th</sup> day (B). HMGR, hydroxymethylglutaryl-CoA reductase; DXR, 1-deoxy-d-xylulose 5-phosphate reductoisomerase; GGPPS, geranylgeranyl diphosphate synthase;

CPS, copalyl diphosphate synthase; KSL, kaurene synthase-like. Values are presented as means  $\pm$ SD, n=3. \*P < 0.05; \*\*P < 0.01; \*\*\*P < 0.001 versus the control culture.

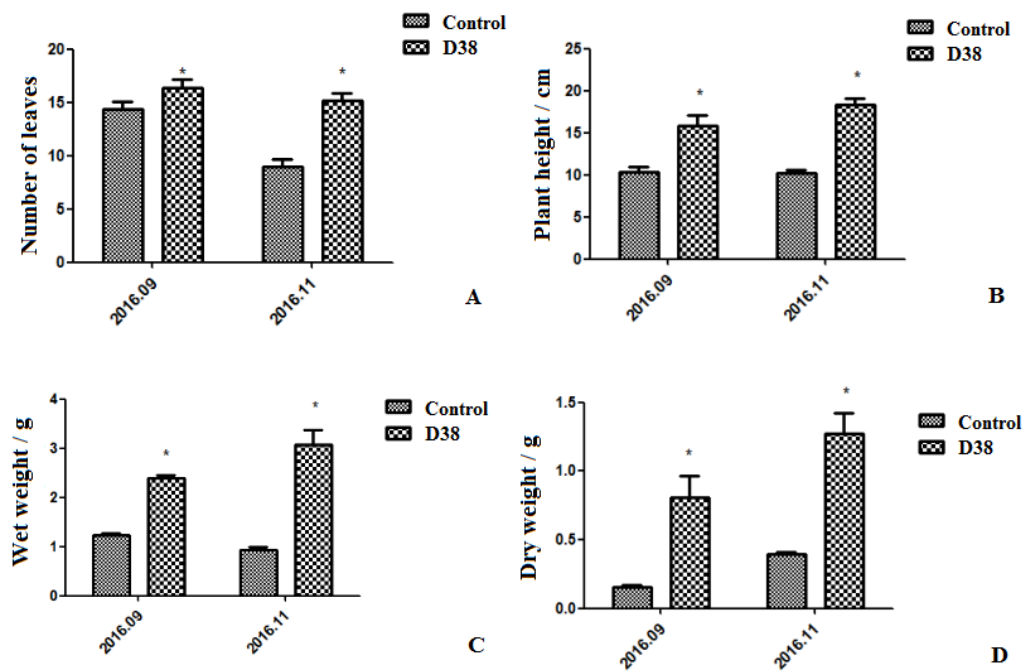

**Figure 7.** The measurement of morphological indexes under the treatment of 20g D38 fertilizer compared with blank group from September, 2016 to December, 2016. (A) Number of leaves; (B) Plant height; (C) wet weight; (D) Dry weight.

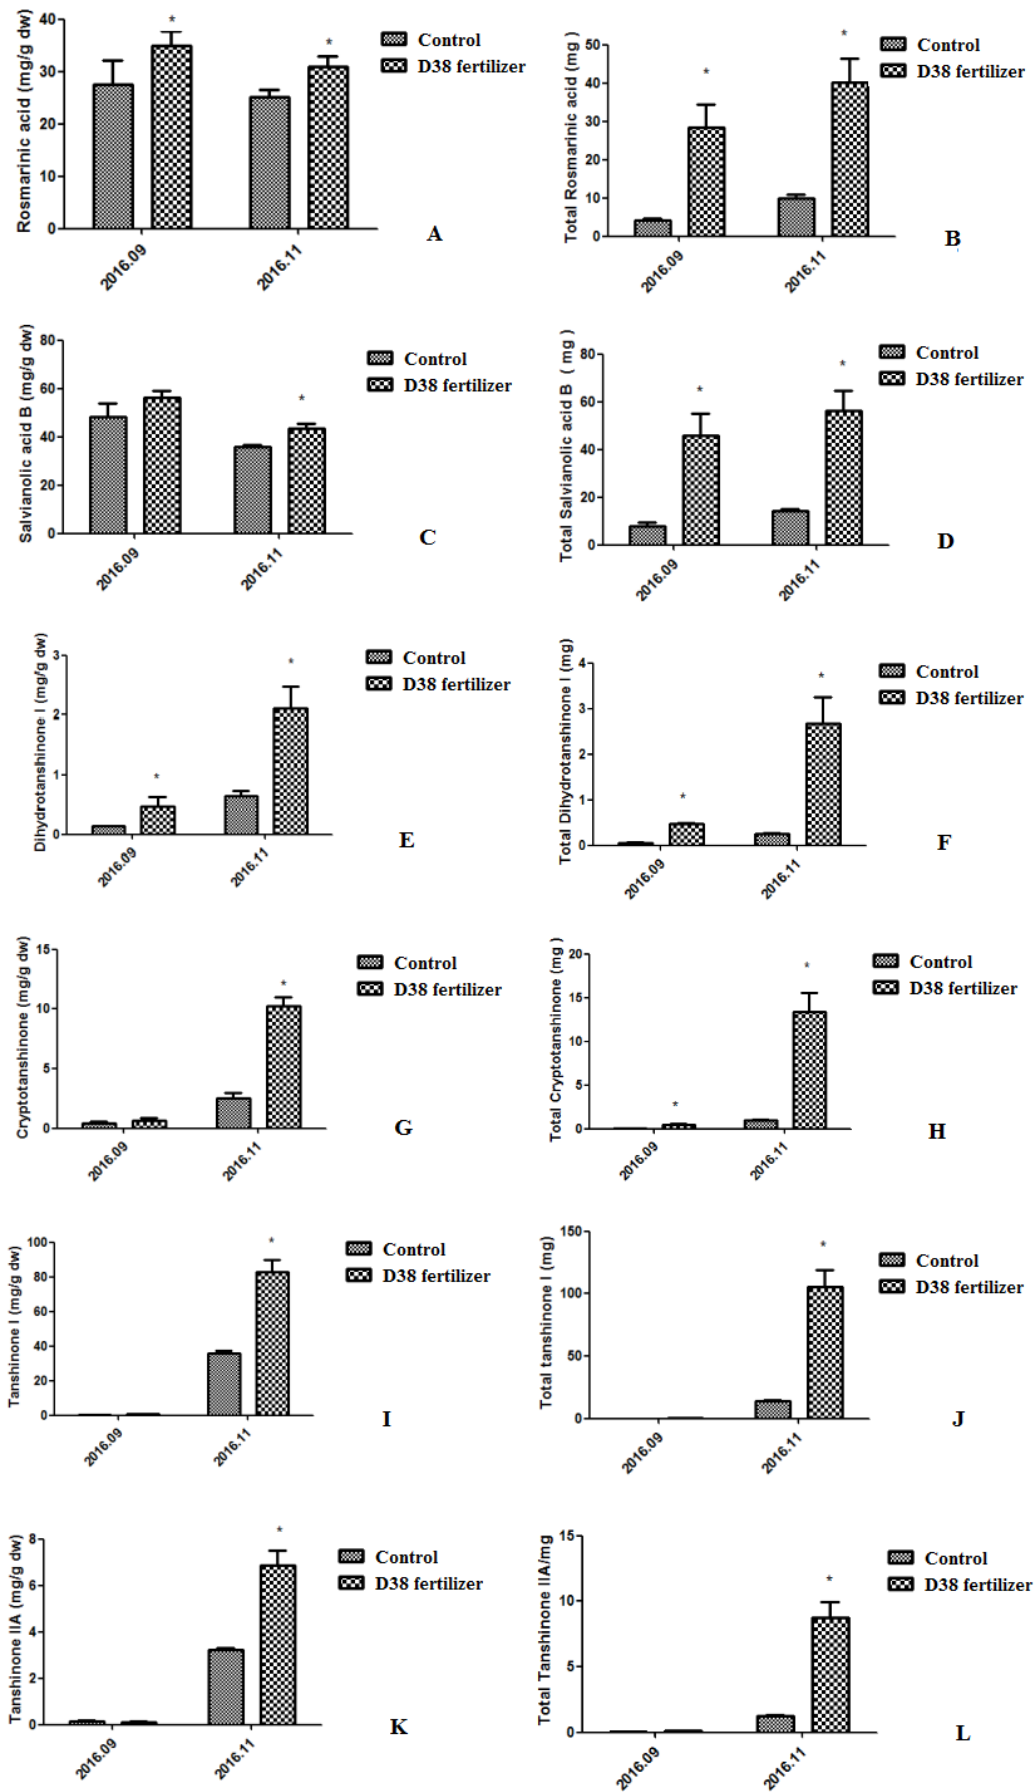

**Figure 8.** The measurement of bioactive substances of *S.miltiorrhiza* root under the treatment of 20g D38 fertilizer compared with blank group from September, 2016 to December, 2016. (A) Rosmarinic content per unit of root mass; (B) Total Rosmarinic content; (C) Salvianolic acid B content per unit of root mass; (D) Total Salvianolic acid B content; (E) Dihydrotanshinone I content per unit of root mass; (F) Total Dihydrotanshinone I content ; (G) Cryptotanshinone per unit of root mass; (H) Total Cryptotanshinone content ; (I) Tanshinone I content per unit of root mass; (J) Total Tanshinone I content; (K) Tanshinone IIA content per unit of root mass; (L) Total Tanshinone IIA content.
